# Supplementary material
Source: PubMed Central journal article supplement (PMC3910601)
Supplement: 1323413111_pnas.201323413SI.pdf [file 1323413111_pnas.201323413SI.pdf]

# Supporting Information

Zafar et al. 10.1073/pnas.1323413111

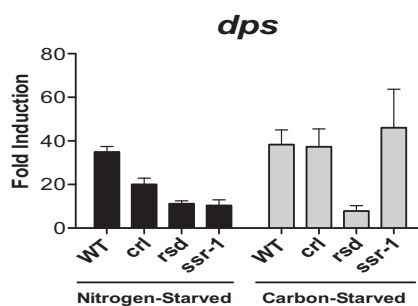

Fig. S1. *dps* expression under carbon-starvation and nitrogen-starvation conditions. Induction of the *dps* promoter in wild-type, *cri*, *rsd*, and *ssr* strains under nitrogen-starvation and carbon-starvation conditions. Error bars represent the SEM.

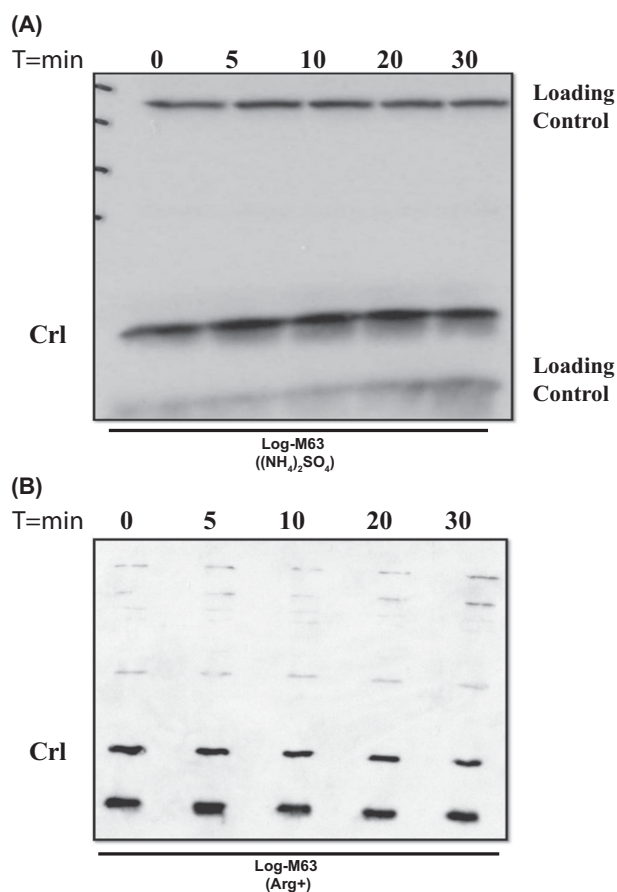

Fig. S2. Crl is a stable protein. Western blot of the Crl protein from MC4100 grown in M63 media supplemented with glucose (A) and from strain AZ-360 under nitrogen limiting conditions M63 (Arg+) (B). Cells were grown to midlog phase, and growth was stopped by adding chloramphenicol (250  $\mu$ g/mL). Cells were collected at the time points indicated and resuspended in sample buffer, boiled, and loaded on an SDS gel.



**Table S1. List of strains used in this study**

| Strain/plasmid                         | Relevant genotype or phenotype                                                                                | Source     |
|----------------------------------------|---------------------------------------------------------------------------------------------------------------|------------|
| MC4100                                 | F <sup>-</sup> <i>araD139</i> Δ( <i>argF-lac</i> )U169 <i>rpsL150</i>                                         | (1)        |
| MG1655                                 | F <sup>-</sup> λ <sup>-</sup> <i>ilvG</i> <sup>-</sup> <i>rfb-50</i> <i>rph-1</i>                             | (2)        |
| HME6mutS                               | W3110Δ( <i>argF-lac</i> )U169 { λcl1857 Δ <i>crl-bioA</i> } <i>galK</i> <sub>TYR145UAG</sub> <i>mutS::amp</i> | (3)        |
| AZ-9                                   | MC4100 <i>crl::kan</i>                                                                                        | This study |
| AZ-35                                  | MC4100 Δ <i>crl</i>                                                                                           | This study |
| AZ246                                  | MG1655 <i>crl::kan</i>                                                                                        | This study |
| AZ-309                                 | MC4100 <i>rpoS::kan</i>                                                                                       | This study |
| AZ-310                                 | MC4100 Δ <i>crl</i> , <i>rpoS::kan</i>                                                                        | This study |
| AZ-14                                  | MC4100 <i>ntrC::tn5</i>                                                                                       | (4)        |
| VC-67                                  | MC4100 <i>rsd::kan</i>                                                                                        | This study |
| VC-167                                 | MC4100 <i>rpoN::kan</i>                                                                                       | This study |
| MJM-106                                | MC4100 <i>ssr-1</i>                                                                                           | (5)        |
| MJM-372                                | MC4100 <i>crl</i> <i>c285 c375 c415</i> ( <i>crl-serine</i> )                                                 | This study |
| AZ-400/pZS*11                          | AZ-35 Amp <sup>R</sup>                                                                                        | This study |
| AZ-360/pZS*11 <i>crl-1000</i>          | AZ-35 <i>crl</i> <sup>+</sup> Amp <sup>R</sup>                                                                | This study |
| AZ-362/ pZS*11 <i>crl-1000 gc-12AT</i> | AZ-35 <i>crl</i> <sup>+</sup> Amp <sup>R</sup>                                                                | This study |
| pCP20                                  | FLP <sup>+</sup> λcl857 <sup>+</sup> λp <sub>R</sub> Rep <sup>ts</sup> Amp <sup>R</sup> Cam <sup>R</sup>      | (6)        |

- Casadaban MJ (1976) Transposition and fusion of the *lac* genes to selected promoters in *Escherichia coli* using bacteriophage *lambda* and *Mu*. *J Mol Biol* 104(3):541–555.
- Guyer MS, Reed RR, Steitz JA, Low KB (1981) Identification of a sex-factor-affinity site in *E. coli* as gamma delta. *Cold Spring Harb Symp Quant Biol* 45(Pt 1):135–140.
- Costantino N, Court DL (2003) Enhanced levels of lambda Red-mediated recombinants in mismatch repair mutants. *Proc Natl Acad Sci USA* 100(26):15748–15753.
- Backman K, Chen YM, Magasanik B (1981) Physical and genetic characterization of the *glnA—glnG* region of the *Escherichia coli* chromosome. *Proc Natl Acad Sci USA* 78(6):3743–3747.
- Lee CA, Fournier MJ, Beckwith J (1985) *Escherichia coli* 6S RNA is not essential for growth or protein secretion. *J Bacteriol* 161(3):1156–1161.
- Cherepanov PP, Wackernagel W (1995) Gene disruption in *Escherichia coli*: TcR and KmR cassettes with the option of Flp-catalyzed excision of the antibiotic-resistance determinant. *Gene* 158(1):9–14.

**Table S2. List of primers used in this study**

| Primer name               | Sequence (5'→3')                                                                             |
|---------------------------|----------------------------------------------------------------------------------------------|
| 5'ompA-RT                 | TACGCGATCACTCCTGAAATC                                                                        |
| 3'ompA-RT                 | GTAGGAAACACCCAGGCTCA                                                                         |
| 5'crl beg-RT              | CACCCGAAGAGCAGATTGAT                                                                         |
| 3'crl beg-RT              | GTTTCACGTTGACGCATACAG                                                                        |
| 5'dps-RT                  | ACCTGAAAGAAGACTGGCTGACC                                                                      |
| 3'dps-RT                  | AGGATATCTGCGGTGTCGTC                                                                         |
| 3'Crl-RT                  | GTTAACTTCACCGGCTCGTC                                                                         |
| MJM335ss                  | CCGGTGCCGGTTTCACGTTGACGCTTACAGCCAGACTATC<br>GAAAAAGAATCGATTATCTTTGCTCTTACCTTCACGAATATACGGGCC |
| MJM67F                    | GAGCATGTCCATATGACGTTACCGAGTGGACACC                                                           |
| MJM68R                    | GTGACGTCAGTCGACTCAGCCGTTAACTTCACCCGG                                                         |
| pZS-KpnI-Crl-c-terminal   | GGGGTACCTCAGCCGTTAACTTCACCCGGC                                                               |
| pZS-XbaI-crl-1000upstream | CCTCTAGAGCCACCCAGGCGATGGTGTGGC                                                               |
| Crl-200-F                 | TCAGCCCGAAGAGGACTCACGC                                                                       |
| Crl(-)gc-AT               | TTGCTATCTCCTGTTGTGATATAACTGTTTTACCAAATTGGC                                                   |
| Crl(+)-gc-AT              | GCCAAATTTGGTAAAACAGTTATATACACAACAGGAGATAGCAA                                                 |

Underlined sequences are either substitutions or restriction sites.
